# Supplementary material for: Lactic Acidosis Triggers Starvation Response with Paradoxical Induction of TXNIP through MondoA
Source: PubMed Central journal article supplement (PMC2937306; doi:10.1371/journal.pgen.1001093), 2010-09-02
Supplement: pgen.1001093.s002.pdf [file pgen.1001093.s002.pdf]

## A. Pawitan

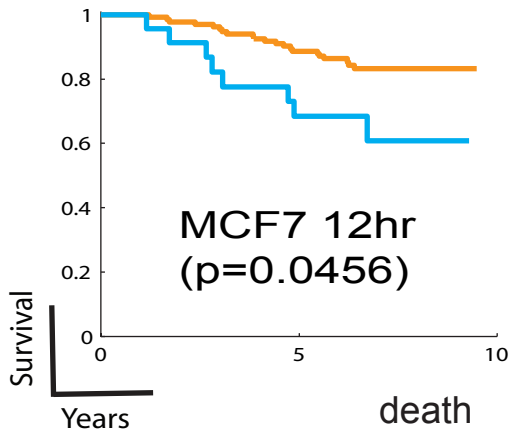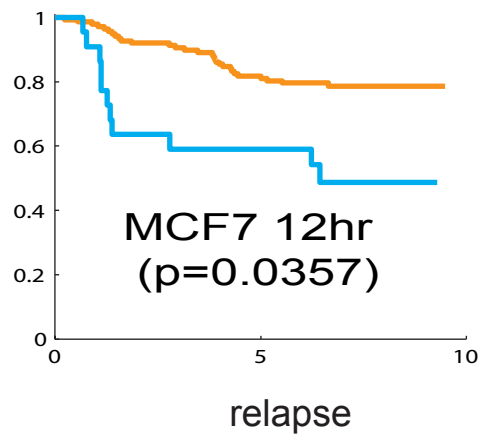

## B. Sotiriou

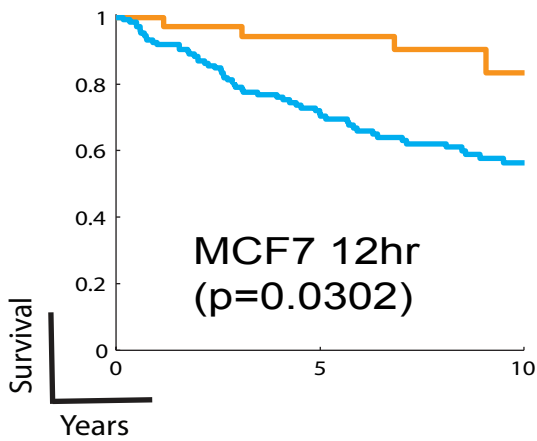

## C. Wang

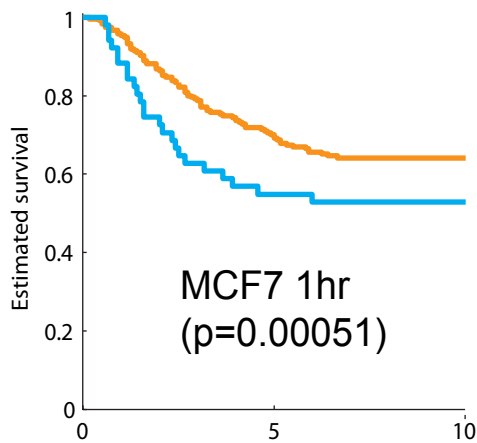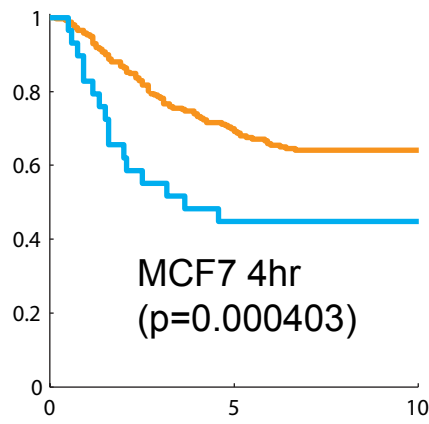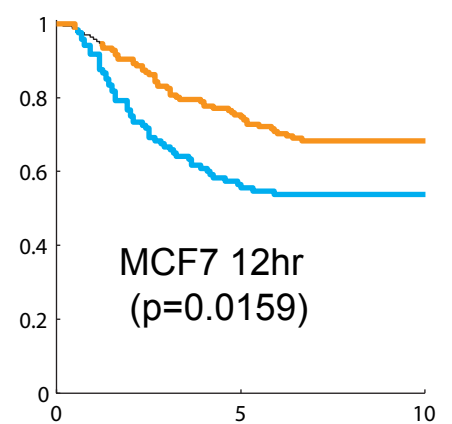

Survival

Years
