# Supplementary material for: Lactic Acidosis Triggers Starvation Response with Paradoxical Induction of TXNIP through MondoA
Source: PubMed Central journal article supplement (PMC2937306; doi:10.1371/journal.pgen.1001093), 2010-09-02
Supplement: pgen.1001093.s009.pdf [file pgen.1001093.s009.pdf]

Control LA

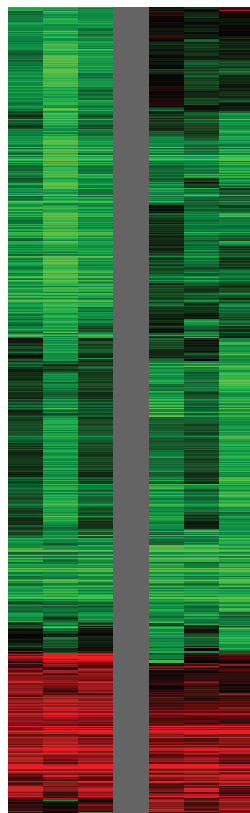

Collagen I  
Collagen 2

TXNIP  
HoxC6  
COX2

C1qc  
C1qb  
AP2  
Notch3
