# Supplementary material for: Lactic Acidosis Triggers Starvation Response with Paradoxical Induction of TXNIP through MondoA
Source: PubMed Central journal article supplement (PMC2937306; doi:10.1371/journal.pgen.1001093), 2010-09-02

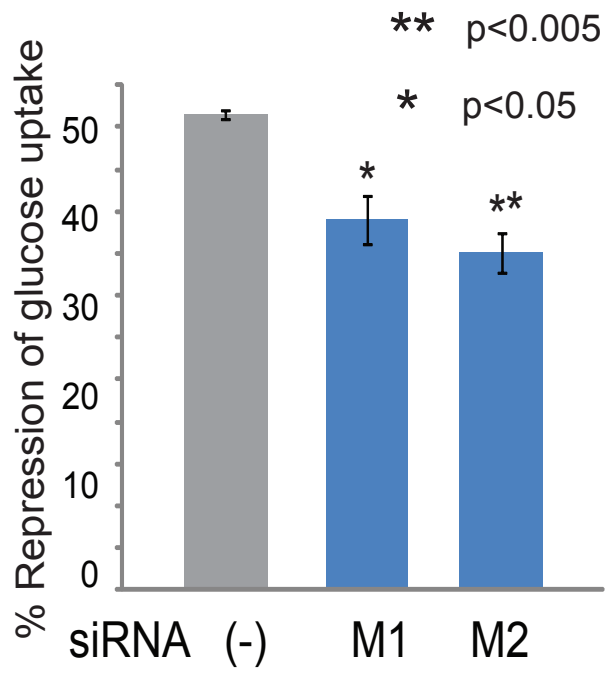

Supplement: pgen.1001093.s011.pdf [file pgen.1001093.s011.pdf]
