# Supplementary material for: Lactic Acidosis Triggers Starvation Response with Paradoxical Induction of TXNIP through MondoA
Source: PLoS Genet. 2010 Sep 2;6(9):e1001093. doi: 10.1371/journal.pgen.1001093 (PMC2937306; doi:10.1371/journal.pgen.1001093)
Supplement: Table S2 — The probesets and average folds of change in affected by indicated conditions are shown for the 115 probe sets which were affected in opposite direction by lactic acidosis and glucose deprivation with the top 1% probability. (0.01 MB XLSX) [file pgen.1001093.s013.xlsx]

## Sheet: c
115 Genes showing significant differential expression changes under each of L.A. and Glucose but with opposite signs
Genes are ordered (top down) in terms of the magnitude of the difference between changes. Remarkably, the 3 probe sets for VDUP1=TXNIP are top.
The "effects" are the estimated fold changes in expression relative to baseline/control [ 0 means not significant ]
LA effect	Glucose effect	O2 effect		Probeid
2.3	-0.77	0.43		201009_s_at
2.2	-0.73	0.46		201008_s_at
2.1	-0.86	0.49		201010_s_at
1.9	-0.84	0.3		225283_at
0.33	-1.3	0		216020_at
0.6	-0.65	0		1552915_at
0.79	-0.44	0.4		213375_s_at
0.51	-0.71	0		226821_at
0.46	-0.75	0.5		226158_at
0.46	-0.74	0		228561_at
0.53	-0.64	0		231121_at
0.34	-0.82	0		221750_at
0.69	-0.45	0		244189_at
0.5	-0.62	0		219390_at
0.57	-0.54	0		1558164_s_at
0.49	-0.62	0		242028_at
0.6	-0.49	0		222273_at
0.45	-0.61	0		209146_at
0.51	-0.54	0		210236_at
0.71	-0.33	0.27		226275_at
0.52	-0.5	0		232293_at
0.7	-0.31	0		201627_s_at
0.57	-0.44	0		238781_at
0.54	-0.46	0		207178_s_at
0.67	-0.33	0		223627_at
0.39	-0.55	0.36		203455_s_at
0.29	-0.66	0		201626_at
0.55	-0.35	0		226285_at
0.63	-0.26	0.36		210592_s_at
0.39	-0.5	0.77		224797_at
0.55	-0.34	0		207291_at
0.68	-0.16	0		208647_at
0.53	-0.29	0		1552329_at
0.4	-0.41	0		213035_at
0.5	-0.3	0		200797_s_at
0.38	-0.41	0.46		221986_s_at
0.35	-0.44	0		213508_at
0.47	-0.32	-0.3		200800_s_at
0.41	-0.36	0		202073_at
0.4	-0.37	0		232092_at
0.37	-0.37	0.33		225904_at
0.42	-0.31	0		238539_at
0.43	-0.31	0.46		221985_at
0.44	-0.28	0		202581_at
0.43	-0.28	0		202540_s_at
0.42	-0.3	0		221903_s_at
0.38	-0.27	0		229321_s_at
0.3	-0.3	0		219326_s_at
0.27	-0.31	0		1552485_at
0.2	-0.21	0		214182_at
-0.28	0.26	0.34		237268_at
-0.45	0.19	-0.37		218590_at
-0.3	0.37	-0.52		218559_s_at
-0.37	0.31	0		225102_at
-0.27	0.42	-0.54		203737_s_at
-0.27	0.47	0		211576_s_at
-0.38	0.38	-0.48		219798_s_at
-0.34	0.43	-0.28		212295_s_at
-0.5	0.28	0		224826_at
-0.31	0.47	0		202431_s_at
-0.44	0.36	0		214758_at
-0.48	0.31	-0.21		209325_s_at
-0.54	0.27	0		229197_at
-0.31	0.51	-0.26		206277_at
-0.21	0.63	0.24		205099_s_at
-0.44	0.41	0		212458_at
-0.52	0.34	0		225807_at
-0.34	0.54	0		226612_at
-0.52	0.36	0		243379_at
-0.44	0.45	0		218574_s_at
-0.59	0.31	0		235109_at
-0.55	0.37	0		229374_at
-0.43	0.49	0		240633_at
-0.48	0.49	0		239602_at
-0.48	0.51	0.44		207655_s_at
-0.71	0.29	0		227376_at
-0.45	0.58	0		225034_at
-0.55	0.48	0		244481_at
-0.79	0.25	-0.25		213237_at
-0.67	0.41	-0.36		235736_at
-0.56	0.53	-0.42		204027_s_at
-0.7	0.41	0		205150_s_at
-0.58	0.54	0		229354_at
-0.81	0.4	-0.36		203887_s_at
-0.96	0.25	0		230777_s_at
-0.78	0.44	0		225627_s_at
-0.69	0.53	0		206114_at
-0.98	0.27	0		219641_at
-0.74	0.51	0		213005_s_at
-0.9	0.38	0		221840_at
-0.48	0.8	0		202149_at
-1	0.27	0		225667_s_at
-0.98	0.36	0		217853_at
-0.97	0.41	0		228948_at
-0.98	0.44	0		213139_at
-0.83	0.6	0		1564838_a_at
-1.1	0.31	0		213390_at
-1.2	0.23	0		1558529_s_at
-0.86	0.61	0		225033_at
-1.1	0.4	0		231931_at
-0.86	0.61	0		221541_at
-1.1	0.36	0		206108_s_at
-1.3	0.25	0		213358_at
-1.1	0.49	0		218995_s_at
-1.2	0.4	0		227449_at
-0.97	0.69	0.54		202437_s_at
-0.85	0.82	0.46		202435_s_at
-0.77	0.9	0		202274_at
-0.72	0.97	0		202434_s_at
-1.1	0.57	0		222802_at
-1.3	0.37	0		230493_at
-1.2	0.65	0.43		202436_s_at
-1.9	0.3	-0.47		214652_at
-1.3	1	0		206504_at
-0.84	2	0.75		205749_at
